# Supplementary material for: Circ_0004104 participates in the regulation of ox-LDL-induced endothelial cells injury via miR-942-5p/ROCK2 axis
Source: PubMed Central journal article supplement (PMC9717494; doi:10.1186/s12872-022-02959-1), 2022-12-02
Supplement: 12872_2022_2959_MOESM1_ESM.pdf [file 12872_2022_2959_MOESM1_ESM.pdf]

# The original western blots of Fig1

**F**

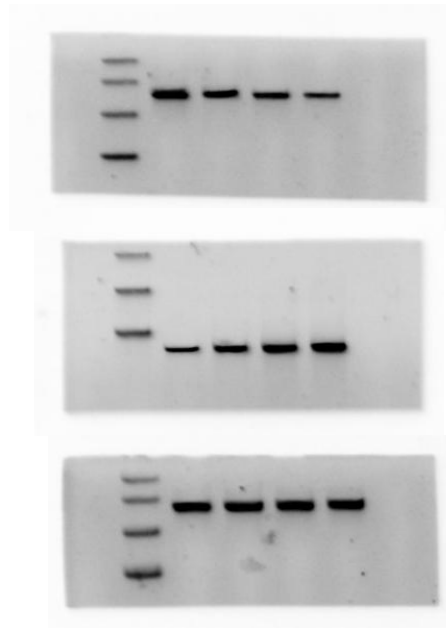

**CyclinD1**

**Cleaved-  
caspase-3**

**GAPDH**

## The original western blots of Fig2

I

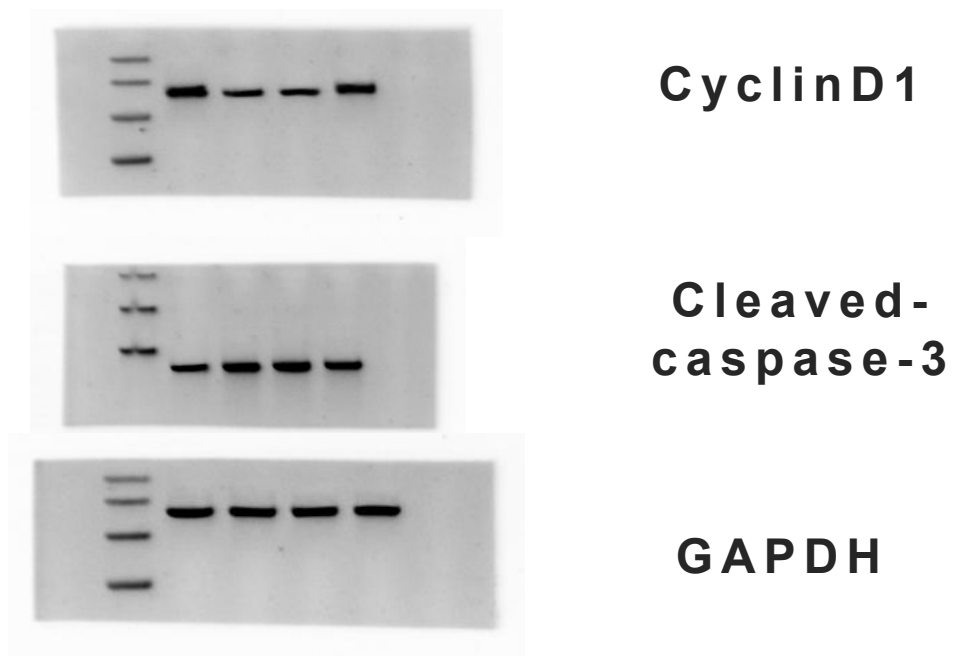

# The original western blots of Fig4

**F**

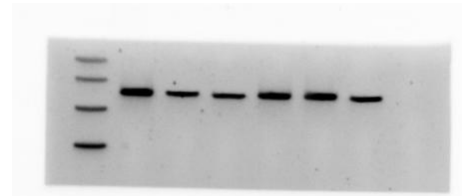

**CyclinD1**

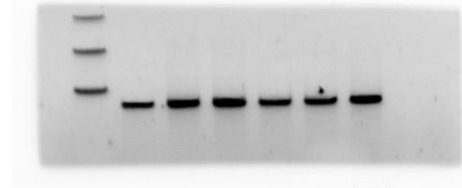

**Cleaved-  
caspase-3**

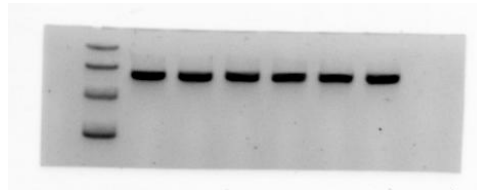

**GAPDH**

# The original western blots of Fig5

**G**

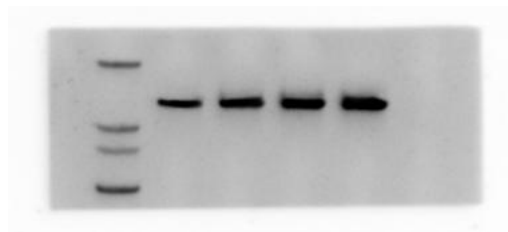

**ROCK2**

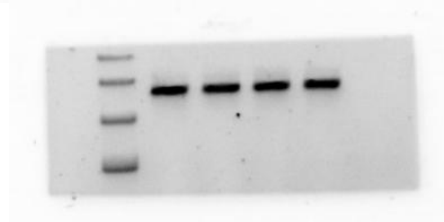

**GAPDH**

**I**

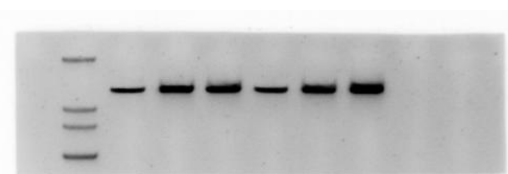

**ROCK2**

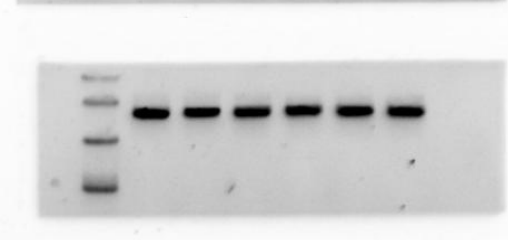

**GAPDH**

# The original western blots of Fig6

**A**

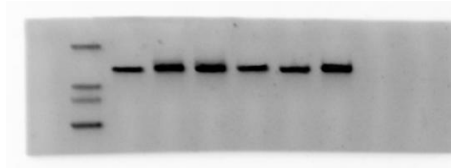

**ROCK2**

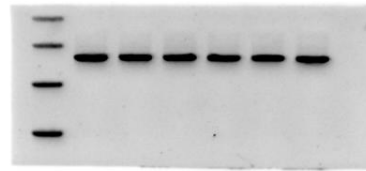

**GAPDH**

# The original western blots of Fig6

**F**

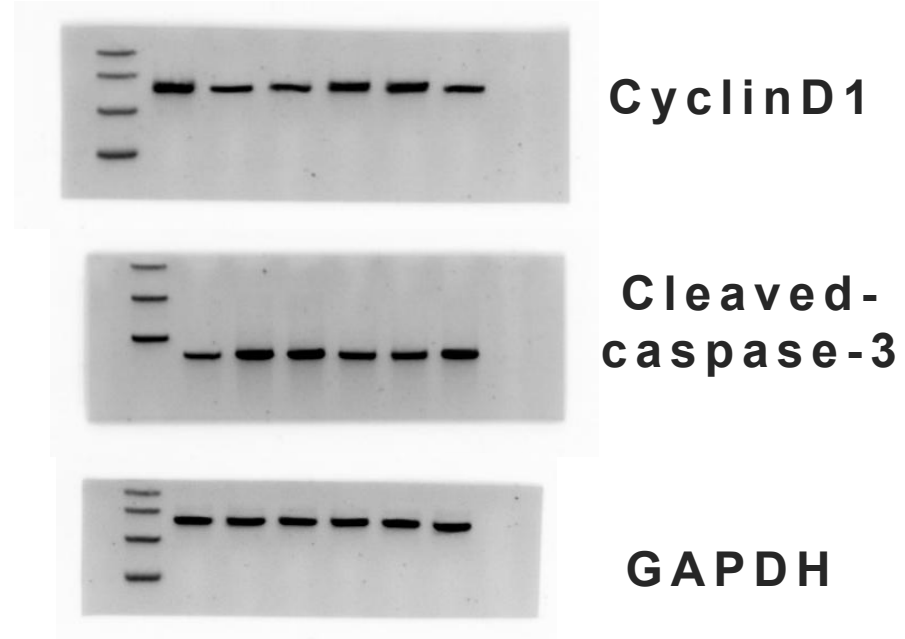

# The original western blots of Fig7

**B**

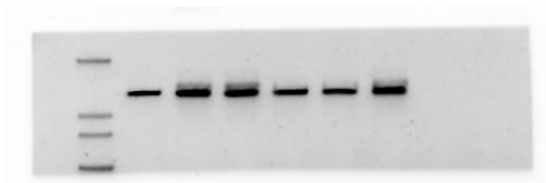

**ROCK2**

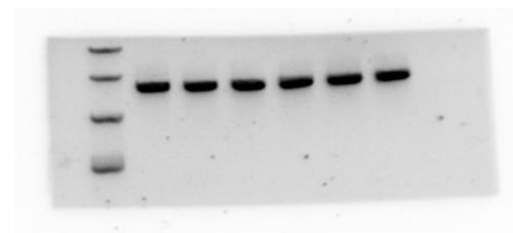

**GAPDH**

# The original western blots of Fig8

**B**

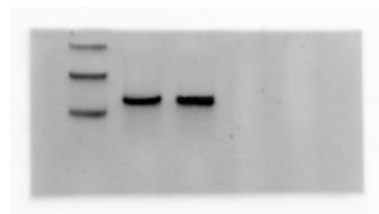

**ROCK2**

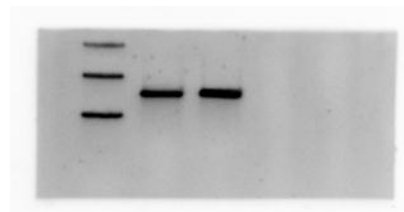

**GAPDH**
